# Supplementary material
Source: publisher figshare collection journal article supplement (https://sage.figshare.com/ndownloader/files/17868407)
Supplement: Supplementary file 1 [file 17868407]

**Supplementary table 1.** Flow chart.

| Study |          | Included in the study | Data on smoking, birth year, and gender. No overlap EIMS/GEMS. | Past smokers excluded | HLA genotype available. Dataset for analysis. |
|-------|----------|-----------------------|----------------------------------------------------------------|-----------------------|-----------------------------------------------|
| EIMS  | Cases    | 2488                  | 2488                                                           | 2230                  | 1626                                          |
|       | Controls | 6122                  | 6122                                                           | 4945                  | 2295                                          |
| GEMS  | Cases    | 6156                  | 6085                                                           | 4983                  | 4212                                          |
|       | Controls | 5408                  | 5357                                                           | 4405                  | 3117                                          |
| Total | Cases    | 9036                  | 8965                                                           | 7210                  | 5838                                          |
|       | Controls | 11530                 | 11479                                                          | 9349                  | 5412                                          |

**Supplementary table 2.** OR with 95% CI of developing MS for subjects categorized by smoking and each of the HLA alleles associated with MS risk with a frequency exceeding 5% among controls. Attributable proportion due to interaction between smoking and each of the HLA alleles.

| Interaction between smoking and DRB1*15:01         |            |                    |                          |                |
|----------------------------------------------------|------------|--------------------|--------------------------|----------------|
| Smoking                                            | DRB1*15:01 | ca/co <sup>1</sup> | OR (95% CI) <sup>2</sup> | AP             |
| -                                                  | -          | 1324/2571          | 1.0 (reference)          |                |
| -                                                  | +          | 1888/1010          | 3.9 (3.2-4.3)            |                |
| +                                                  | -          | 1138/1325          | 1.6 (1.4-1.8)            |                |
| +                                                  | +          | 1488/506           | 6.5 (5.7-7.5)            | 0.3 (0.2-0.4)  |
| Interaction between smoking and absence of A*02:01 |            |                    |                          |                |
| Smoking                                            | A*02:01    | ca/co <sup>1</sup> | OR (95% CI) <sup>2</sup> | AP             |
| -                                                  | +          | 1336/1959          | 1.0 (reference)          |                |
| -                                                  | -          | 1876/1622          | 1.7 (1.5-1.9)            |                |
| +                                                  | +          | 1146/1035          | 1.6 (1.4-1.8)            |                |
| +                                                  | -          | 1480/796           | 2.8 (2.3-2.9)            | 0.2 (0.05-0.3) |
| Interaction between smoking and absence of B*44:02 |            |                    |                          |                |
| Smoking                                            | B*44:02    | ca/co <sup>1</sup> | OR (95% CI) <sup>2</sup> | AP             |
| -                                                  | +          | 392/687            | 1.0 (reference)          |                |
| -                                                  | -          | 2820/2894          | 1.5 (1.3-1.7)            |                |
| +                                                  | +          | 362/341            | 1.9 (1.6-2.4)            |                |

|                                            |            |                    |                          |                  |
|--------------------------------------------|------------|--------------------|--------------------------|------------------|
| +                                          | -          | 2264/1490          | 2.3 (2.0-2.6)            | -0.06 (-0.2-0.1) |
| Interaction between smoking and DRB1*03:01 |            |                    |                          |                  |
| Smoking                                    | DRB1*03:01 | ca/co <sup>1</sup> | OR (95% CI) <sup>2</sup> | AP               |
| -                                          | -          | 2576/2735          | 1.0 (reference)          |                  |
| -                                          | +          | 636/846            | 0.9 (0.8-1.0)            |                  |
| +                                          | -          | 2085/1409          | 1.6 (1.4-1.7)            |                  |
| +                                          | +          | 541/422            | 1.5 (1.3-1.7)            | 0.007 (-0.2-0.2) |
| Interaction between smoking and DQB1*03:02 |            |                    |                          |                  |
| Smoking                                    | DQB1*03:02 | ca/co <sup>1</sup> | OR (95% CI) <sup>2</sup> | AP               |
| -                                          | -          | 2445/2614          | 1.0 (reference)          |                  |
| -                                          | +          | 767/967            | 1.3 (1.2-1.5)            |                  |
| +                                          | -          | 2054/1374          | 1.7 (1.5-1.8)            |                  |
| +                                          | +          | 572/457            | 2.0 (1.7-2.5)            | 0.02 (-0.1-0.2)  |

<sup>1</sup>number of exposed cases and controls; <sup>2</sup>adjusted for age, gender, residential area, study, ancestry, rs9277565, rs2229092, DRB1\*13:03, DRB1\*08:01, B\*38:01,

B\*55:01, DQA1\*01:01, DQB1\*03:01, and when appropriate for DRB1\*15:01. A\*02:01, B\*44:02, DRB1\*03:01, DQB1\*03:02, homozygote correction for

DRB1\*15:01, DRB1\*03:01, and A\*02:01.



**Supplementary table 3.** OR with 95% CI of developing MS for subjects categorized by DRB1\*15:01 and each of the other HLA alleles associated with MS risk with a frequency exceeding 5% among controls. Attributable proportion due to interaction between DRB1\*15:01 and each of the HLA alleles.

| Interaction between DRB1*15:01 and absence of A*02:01 |            |                    |                          |                |
|-------------------------------------------------------|------------|--------------------|--------------------------|----------------|
| DRB1*15:01                                            | A*02:01    | ca/co <sup>1</sup> | OR (95% CI) <sup>2</sup> | AP             |
| -                                                     | +          | 973/2133           | 1.0 (reference)          |                |
| -                                                     | -          | 1489/1763          | 1.7 (1.5-1.9)            |                |
| +                                                     | +          | 1509/861           | 4.2 (3.7-4.8)            |                |
| +                                                     | -          | 1867/655           | 7.0 (6.0-8.0)            | 0.3 (0.2-0.4)  |
| Interaction between DRB1*15:01 and absence of B*44:02 |            |                    |                          |                |
| DRB1*15:01                                            | B*44:02    | ca/co <sup>1</sup> | OR (95% CI) <sup>2</sup> | AP             |
| -                                                     | +          | 309/756            | 1.0 (reference)          |                |
| -                                                     | -          | 2153/3140          | 1.3 (1.1-1.6)            |                |
| +                                                     | +          | 445/272            | 4.1 (3.3-5.0)            |                |
| +                                                     | -          | 2931/1244          | 5.5 (4.7-6.6)            | 0.2 (0.07-0.3) |
| Interaction between DRB1*15:01 and DRB1*03:01         |            |                    |                          |                |
| DRB1*15:01                                            | DRB1*03:01 | ca/co <sup>1</sup> | OR (95% CI) <sup>2</sup> | AP             |
| -                                                     | -          | 1746/2843          | 1.0 (reference)          |                |
| -                                                     | +          | 716/1053           | 0.9 (0.8-1.0)            |                |
| +                                                     | -          | 2915/1301          | 3.5 (3.2-3.9)            |                |

| +                                             | +          | 461/215            | 3.5 (2.9-4.2)            | 0.02 (-0.2-0.2) |
|-----------------------------------------------|------------|--------------------|--------------------------|-----------------|
| Interaction between DRB1*15:01 and DQB1*03:02 |            |                    |                          |                 |
| DRB1*15:01                                    | DQB1*03:02 | ca/co <sup>1</sup> | OR (95% CI) <sup>2</sup> | AP              |
| +                                             | +          | 1660/2705          | 1.0 (reference)          |                 |
| +                                             | -          | 802/1191           | 1.3 (1.1-1.5)            |                 |
| -                                             | +          | 2839/1283          | 3.6 (3.2-4.0)            |                 |
| -                                             | -          | 537/233            | 4.6 (3.8-5.5)            | 0.2 (-0.03-0.3) |

<sup>1</sup>number of exposed cases and controls; <sup>2</sup>adjusted for age, gender, residential area, study, ancestry, smoking, rs9277565, rs2229092, DRB1\*13:03, DRB1\*08:01,

B\*38:01, B\*55:01, DQA1\*01:01, DQB1\*03:01, homozygote correction for DRB1\*15:01, and when appropriate for A\*02:01, B\*44:02, DRB1\*03:01, and

DQB1\*03:02, homozygote correction for DRB1\*03:01 and A\*02:01.

**Supplementary table 4.** OR with 95% CI of developing MS for subjects categorized by A\*02:01 and each of the other HLA alleles associated with MS risk with a frequency exceeding 5% among controls. Attributable proportion due to interaction between A\*02:01 and each of the HLA alleles.

| Interaction between absence of A*02:01 and DRB1*15:01         |            |                    |                          |                 |
|---------------------------------------------------------------|------------|--------------------|--------------------------|-----------------|
| A*02:01                                                       | DRB1*15:01 | ca/co <sup>1</sup> | OR (95% CI) <sup>2</sup> | AP              |
| +                                                             | -          | 973/2133           | 1.0 (reference)          |                 |
| +                                                             | +          | 1509/861           | 4.2 (3.7-4.8)            |                 |
| -                                                             | -          | 1489/1763          | 1.7 (1.5-1.9)            |                 |
| -                                                             | +          | 1867/655           | 7.0 (6.0-8.0)            | 0.3 (0.2-0.4)   |
| Interaction between absence of A*02:01 and absence of B*44:02 |            |                    |                          |                 |
| A*02:01                                                       | B*44:02    | ca/co <sup>1</sup> | OR (95% CI) <sup>2</sup> | AP              |
| +                                                             | +          | 426/723            | 1.0 (reference)          |                 |
| +                                                             | -          | 2056/2271          | 1.4 (1.2-1.7)            |                 |
| -                                                             | +          | 328/305            | 1.9 (1.5-2.3)            |                 |
| -                                                             | -          | 3028/2113          | 2.4 (2.1-2.8)            | 0.04 (-0.1-0.2) |
| Interaction between absence of A*02:01 and DRB1*03:01         |            |                    |                          |                 |
| A*02:01                                                       | DRB1*03:01 | ca/co <sup>1</sup> | OR (95% CI) <sup>2</sup> | AP              |
| +                                                             | -          | 2149/2423          | 1.0 (reference)          |                 |
| +                                                             | +          | 333/571            | 0.9 (0.8-1.0)            |                 |

|                                                       |            |                    |                          |                  |
|-------------------------------------------------------|------------|--------------------|--------------------------|------------------|
| -                                                     | -          | 2512/1721          | 1.7 (1.5-1.8)            |                  |
| -                                                     | +          | 844/697            | 1.6 (1.4-1.9)            | 0.07 (-0.08-0.2) |
| Interaction between absence of A*02:01 and DQB1*03:02 |            |                    |                          |                  |
| A*02:01                                               | DQB1*03:02 | ca/co <sup>1</sup> | OR (95% CI) <sup>2</sup> | AP               |
| +                                                     | -          | 1877/2146          | 1.0 (reference)          |                  |
| +                                                     | +          | 605/848            | 1.2 (1.1-1.4)            |                  |
| -                                                     | -          | 2622/1842          | 1.7 (1.5-1.9)            |                  |
| -                                                     | +          | 734/576            | 2.2 (1.9-2.6)            | 0.1 (-0.003-0.3) |

<sup>1</sup>number of exposed cases and controls; <sup>2</sup>adjusted for age, gender, residential area, study, ancestry, smoking, rs9277565, rs2229092, DRB1\*15:01, DRB1\*13:03,

DRB1\*08:01, B\*38:01, B\*55:01, DQA1\*01:01, DQB1\*03:01, homozygote correction for DRB1\*15:01, and A\*02:01, and when appropriate for B\*44:02,

DRB1\*03:01, DQB1\*03:02, homozygote correction for DRB1\*03:01.



Supplementary table 5. OR with 95% CI among subjects with different combinations of DQA1\*01:01 and DRB1\*15:01, in total and stratified by smoking. Attributable proportion due to interaction between absence of DQA1\*01:01 and DRB1\*15:01.

| DQA1*01:01 | DRB1*15:01 | ca/co <sup>1</sup> | Total                    |                          | Smokers            |                          | Never smokers      |                          |
|------------|------------|--------------------|--------------------------|--------------------------|--------------------|--------------------------|--------------------|--------------------------|
|            |            |                    | OR (95% CI) <sup>2</sup> | OR (95% CI) <sup>3</sup> | ca/co <sup>1</sup> | OR (95% CI) <sup>3</sup> | ca/co <sup>1</sup> | OR (95% CI) <sup>3</sup> |
| +          | -          | 752/1198           | 1.0 (reference)          | 1.0 (reference)          | 369/447            | 1.0 (reference)          | 383/751            | 1.0 (reference)          |
| -          | -          | 1710/2698          | 0.9 (0.8-1.1)            | 0.9 (0.8-1.0)            | 769/878            | 1.0 (0.8-1.2)            | 941/1820           | 0.9 (0.8-1.1)            |
| +          | +          | 314/239            | 2.5 (1.7-3.5)            | 2.2 (1.8-2.8)            | 122/77             | 2.1 (1.5-3.0)            | 192/162            | 2.5 (1.9-3.2)            |
| -          | +          | 3062/1277          | 3.5 (3.0-4.2)            | 3.6 (3.2-4.1)            | 1366/429           | 3.9 (3.2-4.7)            | 1696/848           | 3.6 (3.1-4.2)            |
|            |            |                    |                          | 0.4 (0.3-0.5)            |                    | 0.5 (0.3-0.6)            |                    | 0.3 (0.2-0.5)            |

<sup>1</sup>exposed number of cases and controls; <sup>2</sup>adjusted for age, gender, residential area, ancestry, and study; <sup>3</sup>adjusted for age, gender, residential area, ancestry, study, A\*0201, DRB1\*0301, DRB1\*1303, DRB1\*0801, B\*4402, B\*3801, B\*5501, DQA1\*0101, DQB1\*0301, DQB1\*0302, homozygote correction for DRB1\*15, DRB1\*0301 and A\*0201; AP=attributable proportion due to interaction.
